1 **Population sequencing enhances understanding of tea plant**  
2 **evolution**

3 **Xinchao Wang<sup>1,6</sup>, Hu Feng<sup>2,6</sup>, Yuxiao Chang<sup>2,6</sup>, Chunlei Ma<sup>1,6</sup>, Liyuan Wang<sup>1,6</sup>, Xinyuan Hao<sup>1,6</sup>,**  
4 **A'lun Li<sup>2</sup>, Hao Cheng<sup>1</sup>, Lu Wang<sup>1</sup>, Peng Cui<sup>2</sup>, Jiqiang Jin<sup>1</sup>, Xiaobo Wang<sup>2</sup>, Kang Wei<sup>1</sup>, Cheng**  
5 **Ai<sup>2</sup>, Sheng Zhao<sup>2</sup>, Zhichao Wu<sup>2</sup>, Youyong Li<sup>3</sup>, Benying Liu<sup>3</sup>, Guo-Dong Wang<sup>4,5\*</sup>, Liang Chen<sup>1\*</sup>,**  
6 **Jue Ruan<sup>2\*</sup>, Yajun Yang<sup>1\*</sup>**

7 <sup>1</sup> Key Laboratory of Tea Biology and Resources Utilization, Ministry of Agriculture and Rural  
8 Affairs, National Center for Tea Plant Improvement, Tea Research Institute, Chinese Academy of  
9 Agricultural Sciences, Hangzhou, China. <sup>2</sup> Lingnan Guangdong Laboratory of Modern Agriculture,  
10 Genome Analysis Laboratory of the Ministry of Agriculture and Rural Affairs, Agricultural Genomics  
11 Institute at Shenzhen, Chinese Academy of Agricultural Sciences, Shenzhen, China. <sup>3</sup> Tea Research  
12 Institute, Yunnan Academy of Agricultural Sciences, Menghai, China. <sup>4</sup> State Key Laboratory of  
13 Genetic Resources and Evolution, Kunming Institute of Zoology, Chinese Academy of Sciences,  
14 Kunming, China. <sup>5</sup> Center for Excellence in Animal Evolution and Genetics, Chinese Academy of  
15 Sciences, Kunming 650223, China. <sup>6</sup> These authors contributed equally: Xinchao Wang, Hu Feng,  
16 Yuxiao Chang, Chunlei Ma, Liyuan Wang, Xinyuan Hao. \* e-mail: wanggd@mail.kiz.ac.cn;  
17 liangchen@tricaas.com; ruanjue@caas.cn; yjyang@tricaas.com

18  
19 **Abstract**

20 Tea is an economically important plant characterized by a large genome size and high  
21 heterozygosity and species diversity. In this study, we assembled a 3.26 Gb high-quality  
22 chromosome-scale genome for tea using the ‘Longjing 43’ cultivar of *Camellia sinensis*  
23 var. *sinensis*. Population resequencing of 139 tea accessions from around the world was  
24 used to investigate the evolution of tea and to reveal the phylogenetic relationships among

25 tea accessions. With the spread of tea cultivation, hybridization has increased the  
26 heterozygosity and wide-ranging gene flow among tea populations. Population genetics  
27 and transcriptomics analyses revealed that during domestication, the selection for disease  
28 resistance and flavor in *C. sinensis* var. *sinensis* populations has been stronger than that in  
29 *C. sinensis* var. *assamica* populations. The data compiled in this study provide new  
30 resources for the marker assisted breeding of tea and are a basis for further research on the  
31 genetics and evolution of tea.

32 **Keywords:** Longjing 43 genome, *de novo* genome assembly, *Camellia sinensis*, tea  
33 population resequencing, tea origin, tea evolution, terpene biosynthesis, disease resistance  
34

## 35 **Introduction**

36 Tea [*Camellia sinensis* (L.) O. Kuntze,  $2n = 30$ ] is one of the most important and  
37 traditional economic crops in many developing countries in Asia, Africa, and Latin  
38 America, and it is consumed as a beverage by more than two-thirds of the world's  
39 population<sup>1,2</sup>. Originally, tea was used as a medicinal herb in ancient China, and it was not  
40 until the Tang dynasty (A.D. 618-907) that it gained popularity as a beverage<sup>3,4</sup>. From that  
41 time on, tea planting expanded throughout the world through the influence of trading along  
42 the Silk and Tea Horse Roads<sup>5,6</sup>. Subsequent to its initial domestication, the further  
43 breeding and cultivation of tea contributed to enhancement of certain organoleptic traits,  
44 primarily taste and aroma, and biotic and abiotic stress resistance properties, including cold  
45 and disease resistances<sup>7</sup>. However, the genes underlying the traits that were gradually  
46 selected and expanded remain to be determined.

47 The majority of cultivated tea plants belong to the genus *Camellia* L., section *Thea* (L.)  
48 Dyer, in the family Theaceae, and are categorized into one of two main varieties: *C.*  
49 *sinensis* var. *sinensis* (CSS) and *C. sinensis* var. *assamica* (Masters) Chang (CSA). CSS is  
50 characterized by smaller leaves, cold tolerance, and a shrub or semi-shrub growth habit,  
51 whereas CSA has larger leaves and an arbor or semi-arbor habit<sup>8,9</sup>. Moreover, some *C.*  
52 *sinensis*-related species (CSR) belonging to the section *Thea*, such as *C. taliensis* (W.W.  
53 Smith) Melchior, *C. crassicolumna* Chang, *C. gymnogyna* Chang, and *C. tachangensis* F.C.  
54 Zhang, are locally consumed as tea by inhabitants in certain regions of the Indo-China  
55 Peninsula, particularly in Yunnan Province, China. Theoretically, different species are  
56 assumed to have experienced reproductive isolation; however, different tea species can  
57 readily hybridize, and thus it is difficult to accurately classify the offspring of different  
58 hybrids. Moreover, numerous morphological features are continuous, which makes it  
59 difficult to identify taxonomic groups<sup>10</sup>. The traditional classifications of tea have been  
60 based on morphology and sometimes contradict the more recent classifications based on  
61 molecular characterization<sup>11-15</sup>; however, given that tea plant taxonomy generally lacks  
62 comprehensive genomic evidence, further analyses using population resequencing are  
63 required to optimize taxonomic assignments at the whole-genome level.

64 With a view toward gaining a better understanding of the domestication, breeding, and  
65 classification of tea, we collected and sequenced samples of 139 tea accessions from across  
66 the world. High-quality annotated genes and chromosome-scale tea genomes were  
67 necessary for our population research. In this regard, previous elucidations of the genomes  
68 of the tea cultivars Yunkang 10 (YK10, CSA)<sup>1</sup> and Shuchazao (SCZ, CSS)<sup>16</sup> are considered  
69 important milestones in tea genetic research. However, these two genomes were not

70 characterized at the chromosome scale, and scaffold N50 values were less than 1.4 Mb,  
71 thereby impeding evaluation of the phenotypic variation and genome evolution in  
72 important intergenic regions. Moreover, the core genes (Benchmarking Universal Single-  
73 Copy Orthologs<sup>17</sup>, BUSCO) of the SCZ and YK10 genomes were respectively only 80.58%  
74 and 68.58% complete, and accordingly this incomplete gene annotation has hampered  
75 further population selection, functional genomics analysis, and molecule breeding research.  
76 Therefore, for the purposes of *de novo* genome assembly in the present study, we focused  
77 on the ‘Longjing 43’ (LJ43) cultivar of *C. sinensis*, which is among the most widely  
78 cultivated tea cultivars in China, and it is characterized by high cold resistance, extensive  
79 plantation adaptation, early sprouting time, excellent taste and favorable aroma, etc<sup>18</sup>.

80 Herein, we describe a high-quality chromosome-scale tea genome, along with divergent  
81 selection directions in the CSS and CSA populations, and present a phylogenetic tree of  
82 tea. However, details regarding the origin of tea and the subsequent routes of expansion  
83 remain to be clarified, thus presenting opportunities for further research.

## 84 **Results**

### 85 **Sequencing and assembly of the LJ43 genome**

86 The predicted size of the LJ43 genome was approximately 3.32 Gb (Supplementary  
87 Figs. 1 and 2), which is larger than the assembled YK10 (2.90–3.10 Gb)<sup>1</sup> and SCZ (~2.98  
88 Gb)<sup>16</sup> genomes. To enhance genome assembly, 196 Gb SMRT long reads (Supplementary  
89 Table 1) were initially assembled using WTDBG<sup>19</sup> (Version 1.2.8; Supplementary  
90 Material), which resulted in a 3.26-Gb assembled genome containing 37,600 contigs and  
91 covering approximately 98.19% of the whole genome. To further improve the integrity of  
92 the assembled genome, contigs were scaffolded based on chromosome conformation

93 capture sequencing (Hi-C) (Supplementary Table 1, Supplementary Figs. 3 and 4,  
94 Supplementary Material) and the final assembly of 3.26 Gb was generated with a scaffold  
95 N50 value of 144 Mb. Of the 37,600 initially assembled contigs, 7,071 (~2.31 Gb, 70.9%  
96 of the original assembly) were then anchored with orientation into 15 chromosomal linkage  
97 groups (Fig. 1b, Supplementary Fig 5, Supplementary Tables 2 and 3).

98 To evaluate the quality of the assembled LJ43 genome, we estimated the sequence  
99 accuracy at both the single-base and scaffold levels. The percentages of homogeneous  
100 single-nucleotide polymorphisms (SNPs) and homogeneous insertions-deletions (InDels)  
101 in the genome were 0.000224% and 0.000568%, respectively, thereby indicating a low  
102 error rate at the single-base level (Supplementary Table 4). The accuracy of the scaffolding  
103 was evaluated based on three strategies. Firstly, 5,879 (83.14%) of 7,071 connections in  
104 the Hi-C scaffolds were confirmed with at least two 10x Genomics Chromium linked reads  
105 spanning the connections. Secondly, 5,374 (76.00%) connections were confirmed by at  
106 least two BioNano Genomics (BNG) optical molecules, among which, 4,484 (63.41%)  
107 overlapped with those confirmed by the 10x Genomics Chromium linked reads. In total,  
108 6,769 (95.73%) connections in the scaffold generated with Hi-C could be confirmed by  
109 10x Genomics Chromium linked reads or BNG optical molecules, indicating that the  
110 scaffold was accurate. Thirdly, the collinearity of the tea genetic map<sup>20</sup> with 3,483 single  
111 sequence repeat (SSR) markers and the LJ43 genome had a mean coefficient of  
112 determination ( $R^2$ ) of 0.93, with a maximum value of 0.98 and a minimum value of 0.84  
113 (Fig. 1c, Supplementary Table 3). In summary, the assembly accuracy for the LJ43 genome  
114 at both the single-base and scaffold levels was high.

## 115 **Genome annotation**

116 For genome annotation, we annotated the repetitive sequences of the genome  
117 combined with the strategies of *de novo* and homology-based prediction. We identified and  
118 masked 2.38 Gb (80.06%) of the LJ43 genome as repetitive sequences (Supplementary  
119 Table 5). Among the integrated results, 60.77% (1.98 Gb) were long terminal repeat (LTR)  
120 retrotransposons (Supplementary Table 6), with LTR/Gypsy elements being the dominant  
121 class (49.85% of the whole genome, 1.63 Gb), followed by LTR/Copia elements (7.09%,  
122 231.27 Mb). Compared with the previously sequenced tea genomes, the LTR/Gypsy and  
123 LTR/Copia repeats were similar in SCZ (Gypsy 46%, Copia 8%)<sup>16</sup> and YK10 (Gypsy 47%,  
124 Copia 8%)<sup>1</sup>, whereas the LTR/Gypsy and LTR/Copia repeats in tea are expanded compared  
125 with those in kiwifruit (*Actinidia chinensis*) (13.4%)<sup>21</sup>, silver birch (*Betula pendula*)  
126 (10.8%)<sup>22</sup>, and durian (*Durio zibethinus*) (29.4%)<sup>23</sup>, but contracted compared with those of  
127 maize (*Zea mays*) (74.20%)<sup>24</sup>.

128 LTR retrotransposons are the predominant repeat elements that tend to be poorly  
129 assembled in draft genomes<sup>25</sup>, and it has been reported that the LTR assembly index  
130 (LAI), which approximates to the ratio of intact LTR to total LTR, can be exploited to  
131 evaluate assembly continuity. Thus, we investigated the LTR composition of the LJ43  
132 genome and compared this with that of the SCZ and YK10 genomes, and found that the  
133 LAI of the LJ43, SCZ, and YK10 genomes was 5.50, 3.29, and 0.98, respectively,  
134 thereby indicating that a larger number of intact LTR retrotransposons had been  
135 assembled in the LJ43 genome. We used LTR-finder to detect intact LTR  
136 retrotransposons in the three tea genomes, and then aligned the 5' and 3' terminal repeats  
137 using MUSCLE (version 3.8.31), and calculated the Kimura two-parameter distance for

138 each alignment using EMBOSS (version 6.4.0). The equation  $\text{Time} = K_s/2\mu$  ( $\mu = 6.5E-$   
139  $9)^{26}$  was used to calculate the insertion time of each LTR. Unexpectedly, we found that  
140 the LTR from LJ43 accumulated less point mutations, resulting in the calculated peaks of  
141 LTR insertion in LJ43, SCZ, and YK10 at 1 million years ago (mya), 9 mya, and 9 mya,  
142 respectively (Supplementary Fig. 6). To further investigate this seemingly anomalous  
143 pattern, we performed NGS read error correction during genome assembly. We compared  
144 the genome sequences corrected by PacBio reads and NGS reads and found that 98.19%  
145 of the 5' and 3' terminal IR sequences were corrected no more than three bases by NGS  
146 reads (Supplementary Fig. 6d). Moreover, error correction could not change the  $K_s$  from  
147 0.013 (the peak of LJ43) to 0.117 (the peak of SCZ and YK10). Taken together, our  
148 analyses indicate that the LJ43 genome assembly was more complete than that of the  
149 previously sequenced tea genomes, has a high LAI, and contains more recently derived  
150 LTRs, which resulted in contradictory estimates of the LTR insertion time among LJ43,  
151 SCZ, and YK10.

152 To assist in gene prediction, we generated a total of 340 Gb of clean RNA-seq data  
153 from 19 samples of five tissue types (bud, leaf, flower, stem, and root) collected in each  
154 of the four seasons (with the exception of flowers during summer, Supplementary Table  
155 7). Protein-coding genes were annotated using integrative gene prediction with *ab initio*  
156 prediction, homology search, and transcriptome data. EVidenceModeler (version 1.1.1)  
157 was used to integrate all predicted gene structures. A total of 33,556 protein-coding genes  
158 with an RNA-seq coverage ratio greater than 50% were annotated with an average gene  
159 size of 10,816 bp (Supplementary Material, Supplementary Fig. 7) and a mean number of  
160 5.3 exons per gene (Table 1). Subsequently, we assessed LJ43 genome annotation

161 integrity using the BUSCO database<sup>17</sup>, and found that 1,215 (88.36%) annotations were  
162 complete, compared with the 1,108 (80.58%) and 943 (68.58%) complete annotations  
163 obtained for the SCZ and YK10 genomes, respectively.

164 Using the genome annotation data, we determined the chromosomal locations of  
165 26,561 (79.15%) annotated genes. Furthermore, we compared the protein sequences of  
166 the LJ43 genome with those of *Actinidia chinensis*, which has a high-quality reference  
167 genome sequence and belongs to the order of Ericales, and used MCScanX to detect  
168 synteny (Supplementary Fig. 8). The results revealed that the LJ43 genome comprises  
169 690 collinear blocks containing 18,030 genes, whereas the SCZ genome has 111 collinear  
170 blocks containing 1,487 genes, and that of YK10 has 54 collinear blocks containing 393  
171 genes. Furthermore, we found that the extent of genome synteny between LJ43 and cocoa  
172 (*Theobroma cacao*) is comparable to that with *Actinidia chinensis* (Supplementary  
173 Material).

174

### 175 **Gene family evolution**

176 To gain an insight into the evolution of the tea genome, we grouped orthologous genes  
177 using OrthoMCL (Supplementary Material), and accordingly obtained 24,350 groups of  
178 orthologous gene families among nine genomes: LJ43, *Actinidia chinensis*, *Coffea*  
179 *canephora*, *Theobroma cacao*, *Arabidopsis thaliana*, *Oryza sativa* subsp. *japonica*,  
180 *Populus trichocarpa*, *Amborella trichopoda*, and *Vitis vinifera*. Among these, 1,034 single-  
181 copy gene families were used to construct a phylogeny tree for the tea genome using  
182 *Amborella trichopoda* as an outgroup (Supplementary Fig. 9). Gene family evolution was  
183 analyzed using CAFE, which revealed that a total of 1,936 tea gene families have



184 undergone expansion and 1,510 tea gene families have undergone contraction. Gene  
185 Ontology (GO), InterPro (IPR), and Kyoto Encyclopaedia of Genes and Genomes (KEGG)  
186 enrichment analyses of the expanded genes indicated the expansion of gene families  
187 involved in disease resistance, secondary metabolism, and growth and development (P-  
188 value < 0.05, FDR < 0.05, Supplementary Tables 8-14). Among these families: UDP-  
189 glucuronosyl/UDP-glucosyltransferase (GO:0016758, P-value < 2.20E-16, FDR < 2.40E-  
190 14), which catalyzes glucosyl transfer in flavanone metabolism, is related to catechin  
191 content; (-)-germacrene D synthase (K15803, P-value = 8.01E-06, FDR = 0.91E-03)  
192 catalyzes the conversion of farnesyl-PP to germacrene D and is related to terpene  
193 metabolism; NB-ARC (GO:0043531, P-value < 2.20E-16, FDR < 2.40E-14), Bet v I/Major  
194 latex protein (GO:0009607, P-value = 4.49E-04, FDR = 8.64E-03), RPM1 (K13457, P-  
195 value < 2.20E-16, FDR < 1.25E-13), and RPS2 (K13459, P-value = 8.88E-08, FDR =  
196 2.51E-05) are related to disease resistance; and the S-locus glycoprotein domain  
197 (GO:0048544, P-value < 2.20E-16, FDR < 2.40E-14) is associated with self-  
198 incompatibility.

199 Furthermore, we used the “Branch-site” models A and Test2 to identify those genes in  
200 the tea genome that have evolved under positive Darwinian selection using codeml in the  
201 PAML (version 4.9d) package (Supplementary Material). A total of 1,031 single-copy  
202 genes from the above mentioned nine genomes were scanned to identify those genes under  
203 selection. After filtering (in Methods), we identified 74 genes that appeared to be under  
204 positive selection (FDR ≤ 0.05, Supplementary Table 15); some of these genes are involved  
205 in disease resistance, enhanced cold tolerance, and high light tolerance. In this regard, it  
206 has previously been reported that overexpression of cationic peroxidase 3 (OCP3)<sup>27</sup>

207 (Cha14.159) and Serpin-ZX<sup>28</sup> (Cha9.301) is involved in the process of disease resistance,  
208 and that of beta-glucosidase-like SFR2 (SFR2, Cha5.171) is involved in freezing  
209 tolerance<sup>29</sup>. Other identified genes include one involved in the maintenance of photosystem  
210 II under high light conditions (MPH1<sup>30</sup>, ChaUn21494.1), and a photosystem II 22-kDa  
211 protein (PSBS, Cha9.807) that protects plants against photooxidative damage.

## 212 **Whole-genome duplication and divergence of tea genomes**

213 In order to estimate the whole-genome duplication of the tea genome, we selected a  
214 total of 3,373, 3,199, and 2,992 gene families containing exactly two paralogous genes  
215 from the SCZ, LJ43, and YK10 genomes, respectively, to calculate the Ks values of the  
216 gene pairs. The results showed that the Ks peak of the three tea genomes was 0.3  
217 (Supplementary Fig. 10), and the most recent duplication time was approximately 25 mya  
218 ( $\text{Time} = Ks/2\mu$ ,  $\mu = 6.1E-9$ )<sup>31</sup>, thereby indicating that these cultivars underwent the same  
219 genome duplication event. Syntenic genes between LJ43 and SCZ and between LJ43 and  
220 YK10 were identified to calculate the Ks values of the pairs; the Ks peaks for the LJ43 and  
221 SCZ pairs were approximately 0.003 (~0.25 mya) and for the LJ43 and YK10 pairs were  
222 approximately 0.045 (~3.69 mya) (Supplementary Fig. 11), thus indicating that the  
223 divergence times of LJ43 and SCZ were more recent than those of LJ43 and YK10.

## 224 **Population genetic analysis**

225 Tea leaves from different species or cultivars are often processed into different types  
226 of teas according to their processing suitability and local consumer preferences, e.g., CSA  
227 leaves are often processed to produce black tea, whereas CSS leaves are typically processed  
228 to produce green or oolong tea. To investigate the genetic basis of these differences, we  
229 examined the genomes of the 139 tea accessions collected from around the world, including

230 105 from East Asia, seven from South Asia, nine from Southeast Asia, six from West Asia,  
231 seven from Africa, and five from Hawaii (Fig. 2a, Supplementary Table 16, Supplementary  
232 Material). The specimens were sequenced at an average depth of 13.67-fold per genome  
233 (Supplementary Table 16), and given that the LJ43 genome is well annotation and a high  
234 level of continuity, we selected this as the reference genome. We accordingly achieved an  
235 average mapping rate of 99.07%, with a minimum rate of 96.95% and a maximum rate of  
236 99.66% (Supplementary Table 16). After performing five filtering steps (described in the  
237 Methods section), we identified a total of 218.87 million SNPs among the tea populations,  
238 with a density of approximately 67 SNPs per kb (Fig. 1a, Supplementary Tables 17 and  
239 18). We anticipate that this extensive whole-profile SNP dataset will serve as a valuable  
240 new resource for further tea genomics research and marker assisted breeding.

241 To further investigate the phylogenetic relationships among these accessions, we  
242 constructed a maximum likelihood phylogenetic tree based on SNPs filtered from the total  
243 SNP dataset (Methods) using *Camellia sasanqua* as an outgroup (Fig. 2c). We found that  
244 all samples were clustered into one of three independent clades (Fig. 2c, Supplementary  
245 Fig. 12) corresponding to the CSR, CSS, and CSA populations; this result is consistent  
246 with the morphology-based classical taxonomy of CSA and CSS.

247 Principal component analysis (PCA) was used to investigate the relationships and  
248 differentiation among populations and consistently revealed the presence of three clusters  
249 corresponding to the CSA, CSS, and CSR teas (Fig. 2b). The first two principal  
250 components accounted for 13.08% of the total variance, with PC1 reflecting the variability  
251 of the CSA and CSS groups, and PC2 differentiating CSR plants from CSA and CSS. CSS  
252 had better aggregation than CSA and CSR, while the juncture accessions of CSA and CSS

253 were also close to CSR in the phylogenetic tree. When K was 3, the CSA, CSS and CSR  
254 could be distinguished (Fig. 2d, Supplementary Fig. 13, Supplementary Material), this was  
255 consistent with the PCA result (Fig. 2b). When k ranged from 3 to 4, most of new  
256 accessions collected from China arose from CSA and CSS (yellow color, marked with  
257 arrow in Fig. 2d), indicating their high diversity.

258 On the basis of the phylogenetic and population structure results (Fig. 2c,  
259 Supplementary Figs. 12, 14, and 15), we further investigated the individual and population  
260 heterozygosities among the populations (Supplementary Table 16). We accordingly found  
261 the heterozygosity of CSR ( $6.37E-3$ ) to be significantly higher than that of CSA ( $6.29E-3$ )  
262 and CSS ( $5.69E-3$ ) (both  $P < 0.05$ , Supplementary Fig. 16). We also calculated linkage  
263 disequilibrium (LD) decay values based on the squared correlation coefficient ( $r^2$ ) of  
264 pairwise SNPs in two groups, which revealed that for the CSA and CSS groups, the average  
265  $r^2$  among SNPs decayed to approximately 50% of its maximum value at approximately 41  
266 kb and 59 kb, respectively. These values thus indicate that the tea genomes have relatively  
267 long LD distances and slow LD decays (Supplementary Fig. 17).

### 268 **Selective sweeps of the two major tea populations**

269 It is generally stated that the differences between CSS and CSA teas lie primarily in  
270 their flavor, leaf and tree type, cold tolerance, and processing suitability. Among the  
271 accession assessed in the present study, the CSA population comprised three green tea  
272 accessions and 34 black tea accessions, whereas the CSS population contained 45 green  
273 tea accessions, 19 oolong tea accessions, and 11 black tea accessions (Fig. 3a). To  
274 determine the potential genetic foundation of these differences, we used SweepFinder2  
275 (version 1.0) to scan for the selective sweep regions and selected those regions with the top

276 1% of composite likelihood ratio (CLR) scores and the genes overlapping with the final  
277 sweep regions ( $\geq 300$  bp). On the basis of this analysis, we identified a total of 1,336 genes  
278 bearing selection signatures in the CSA populations, and 1,028 genes bearing selection  
279 signatures in the CSS populations (Supplementary Tables 19 and 20, Supplementary Fig.  
280 18).

281 Based on GO analysis, enriched genes (P-value  $< 0.05$ , FDR  $< 0.05$ ) were selected  
282 from the candidate selective sweep genes of the CSA and CSS populations (Supplementary  
283 Tables 21 and 22, Supplementary Fig. 19); we found that volatile terpene metabolism genes,  
284 such as cytochrome P450s (e.g., geraniol 8-hydroxylase) and terpene synthases, including  
285 alpha-terpineol synthase (*ATESY*), (-)-germacrene D synthase (*TPSGD*), and strictosidine  
286 synthase (*STSY*), were significantly selected in the CSS population but not in the CSA  
287 population (Fig. 3b, Supplementary Tables 21 and 22). The functionalization of core  
288 terpene molecules requires cytochrome P450s<sup>32</sup>, of which geraniol 8-hydroxylase catalyzes  
289 the conversion of geraniol (6E)-8-hydroxygeraniol (Fig. 3b), which may affect the  
290 accumulation level of geraniol. Alpha-terpineol is a monoterpene found in tea, which is  
291 generated by the *ATESY*-mediated catalysis of geranyl-PP, whereas *TPSGD* catalyzes the  
292 conversion of farnesyl-PP to the sesquiterpene germacrene D. Strictosidine is the precursor  
293 of terpenoid indole alkaloids, and *STSY* is a key enzyme in the synthesis of these alkaloids  
294 (Fig. 3b). Moreover, we found that 80% of the selected terpene-related genes showed  
295 relatively high expression in buds or leaves, while 33% of the selected terpene-related  
296 genes showed significant high expression in buds or leaves (Fig. 3c, Supplementary Table  
297 23).

298 Compared with CSA accessions, we also observed the selection of a larger number of  
299 *NBS-ARC* (nucleotide-binding site domain in apoptotic protease-activating factor-1, R  
300 proteins and *Caenorhabditis elegans* death-4 protein) genes in CSS accessions, the  
301 *Arabidopsis* homologs of which, including *RPS3* (also known as *RPM1*)<sup>33</sup>, *RPS5*<sup>34</sup>, and  
302 *SUMM2*<sup>35</sup>, have been shown to be involved in resistance to *Pseudomonas syringae* (*RPS*),  
303 (Supplementary Tables 21 and 22). The expression profiles of these genes revealed that  
304 69% of the *NBS-ARC* genes subject to selection are highly expressed in spring, autumn, or  
305 winter, while 24% of the *NBS-ARC* genes are significant highly expressed in spring,  
306 autumn, or winter (Fig. 3d, Supplementary Table 24). However, among the 214 genes  
307 under selection in both CSS and CSA populations, we were unable to detect the enrichment  
308 of any genes related to flavor synthesis or abiotic and biotic stress resistance in the CSA  
309 population (Supplementary Tables 19 and 20).

310

## 311 **Discussion**

312 This study represents the most comprehensive tea genome sequencing project  
313 conducted to date, and we present the first chromosome-scale genome sequence of tea  
314 and resequenced data of 139 tea accessions collected world. On the basis of our analyses,  
315 we have generated new resources, which will prove valuable for future tea-related  
316 genomics research and molecular breeding. These data reveal the genome-wide  
317 phylogeny of tea and the divergent selection direction between the two main tea varieties,  
318 namely CSS and CSA. In CSS, genes involved in flavor metabolism and cold tolerance  
319 were subjected to stronger selection than that in CSA; both traits were consistent with the  
320 fact that tea accessions from the east and north of China, like green and oolong tea, have

321 a distinct aroma, and are cold tolerant. Our data also showed that the CSR population was  
322 the ancestral of the CSS and CSA, though this was a critical step toward the detail  
323 scenarios of the origin and domestication of CSS and CSA, the remain untold chapter  
324 need the identification of the closest ancestor of tea as well as the collection of more CSR  
325 in the future.

326 The first important criterion in a genome sequencing project is to obtain a high-quality  
327 reference genome and call an SNP set with high confidence from well-mapped  
328 resequencing data. In this regard, the inherent nature of the tea genome, notably its large  
329 size, high heterozygosity (Supplementary Table 25), and large number of repetitive  
330 sequences (Supplementary Tables 5 and 6), have previously led to difficulties in genome  
331 assembly. Although prior to the present study, the genomes of the YK10 and SCZ tea  
332 cultivars have been reported, these are characterized by relatively low continuity compared  
333 with that of the major currently assembled genomes (Mb scale) at both the contig and  
334 scaffold levels. Moreover, the associated BUSCO scores indicated that only approximately  
335 80% of predicted genes could be identified in these genomes. Taking advantage of recent  
336 advances in sequencing and assembling technologies, we were able to sequence the  
337 genome of the LJ43 tea cultivar at the chromosome scale, generating an assembly  
338 characterized by a scaffold N50 value of 144 Mb, 88% gene completeness, and a base  
339 accuracy of 99.999%. There still needs improvement for the genome annotation in the  
340 future considering the complex of the tea genome. Combined with other analyses, our  
341 results showed that the quality of the LJ43 genome is higher than that of the previously  
342 published tea genomes<sup>1,16</sup>. Furthermore, our whole-genome sequencing of 139 worldwide  
343 tea accessions generated 6,272.74 Gb of short reads and 218.87 million high-confidence

344 SNPs, and overall, the datasets obtained in the present study provide the richest genomic  
345 resource for tea researchers compiled to date.

346 *Camellia* is ranked as one of the most taxonomically and phylogenetically challenging  
347 plant taxa<sup>12</sup>, and we noted many disparities between assignments based on traditional  
348 taxonomic systems, which rely primarily on morphology, and our phylogenetic tree based  
349 on whole-genome sequencing analysis. Gene flow was widespread among tea accessions  
350 (Supplementary Material, Supplementary Table 26-28, Supplementary Fig. 19), and this  
351 presents challenges for the determination of the origin and evolution of tea. For example,  
352 *C. taliensis* (HZ122, HZ114) and *C. gymnogyna* (HZ104) have previously been assigned  
353 to the CSA population. Bitter tea, a hybrid progeny of CSS and CSA teas<sup>36</sup>, is a transitional  
354 type of large-leaved tea with a growth habit ranging from tree-like to shrub-like, and is  
355 mainly distributed in areas with mixed growth of CSS and CSA. In our phylogenetic tree,  
356 bitter teas (HZ039, HZ092, HZ080, and HSKC) were closely clustered with transitive teas  
357 in CSS and CSA, thereby supporting the fact that bitter tea is a hybrid progeny of CSS and  
358 CSA. It is expected that further worldwide sampling and more comprehensive data analysis  
359 will reduce current debates concerning tea taxonomy.

360 Unlike annual crops or perennial self-compatible crops, tea has not experienced  
361 severe domestication bottlenecks between wild progenitors and cultivated varieties<sup>37</sup>  
362 (Supplementary Material, Supplementary Figs. 20 and 21), which can be attributed to the  
363 fact that the breeding of tea plants has largely been determined by environmental  
364 influences rather than human behavior, based on multiple generations of screening.  
365 During the expansion and domestication of tea, cultivated teas have been crossed with  
366 wild relatives, and this has contributed to the current genetic complexity of tea



367 populations. This interbreeding is reflected by our observation that many cultivars and  
368 wild resources clustered together in the phylogenetic tree, with ancestral wild relatives  
369 appearing in the CSS cluster when a K value of 3 is used in the structural analysis  
370 (Supplementary Material, Supplementary Tables 16, 26-28, Supplementary Figs. 13 and  
371 19). Although China has the longest tea cultivation history and the oldest written  
372 literature<sup>4,38,39</sup> to support the hypothesis that tea plants originated in this country, there is  
373 still a lack of consensus regarding the events associated with the domestication of tea. In  
374 this regard, Meegahakumbura et al (2016) have suggested that the origins of CSS and  
375 CSA in China and CSA in India can probably be traced to three independent  
376 domestication events in three separate regions across China and India<sup>40,41</sup>, however, the  
377 lack of the convinced closest ancestor of both CSS and CSA in their analysis made the  
378 speculation doubtful. Our data showed that the CSR population was the ancestral of the  
379 CSS and CSA, though this was a critical step toward the detail scenarios of the origin and  
380 domestication of CSS and CSA, the remain untold chapter need the identification of the  
381 closest ancestor of tea as well as the collection of more CSR in the future. .

382 In the present study, we identified two interesting selection signatures in the CSS  
383 population, one of which is associated with genes involved in the terpene synthesis  
384 pathway. Terpene volatiles play essential roles in defining the characteristic aroma of tea,  
385 and the compositions and concentrations of these volatiles are controlled at the genetic  
386 level<sup>42</sup>. Different species or varieties of tea plants are characterized by differences in  
387 terpene profiles, and in this regard, Takeo et al. found that the contents and ratios of linalool  
388 and its oxides are high in CSA, whereas the contents and ratios of geraniol and nerolidol  
389 are high in CSS<sup>43-45</sup>. The main terpenoids determining the aroma of black tea are linalool

390 and its oxides, whereas geraniol and nerolidol contribute to the aroma of green tea and  
391 oolong tea<sup>46</sup>. These distinctions are consistent with the findings of our population selection  
392 analysis, which revealed that the terpene metabolism genes geraniol 8-hydroxylase, *ATESY*,  
393 *TPSGD*, and *STSY* have been significantly selected. In addition, our KEGG enrichment  
394 analysis of expanded gene families revealed that *TPSGD* is expanded in the LJ43 cultivar  
395 at the genomic level. Moreover, the flavor of different tea types has been influenced to a  
396 certain extent by consumer predilection and culture. On the basis of the processing  
397 suitability of CSA and CSS and the population selection analysis of the two populations,  
398 we can conclude that terpenoid metabolism is more closely related to the aroma of green  
399 and oolong tea than it is to that of black tea.

400 The second selection signature of interest identified in the present study relates to the  
401 *NB-ARC* genes in the CSS population. Most of these genes are associated with resistance  
402 to ice nucleation active (INA) bacteria. In *Arabidopsis*, *RPS3/RPM*<sup>33</sup>, *RPS5*<sup>34</sup>, and  
403 *SUMM2*<sup>35</sup> have been shown to confer resistance to *Pseudomonas syringae*, which is one of  
404 the most well-studied plant pathogens that can infect almost all economically important  
405 crop species. In addition, *Pseudomonas syringae* is a prominent INA bacterium and has  
406 been proposed to be an essential factor contributing to frost injury in agricultural crops<sup>47</sup>.  
407 Mutants characterized by alterations in the aforementioned genes have also been found to  
408 show sensitivity to chilling temperature compared with the corresponding wild-type  
409 plants<sup>33-35</sup>. Similarly, in wild potato (*Solanum bulbocastanum*), the *RGA2*<sup>48</sup> and *RIA6* are  
410 involved in resistance to *Phytophthora infestans*, a further factor related to INA bacteria.  
411 Moreover, significant differences have been detected in the expression of *RPS3* and  
412 *SUMM2* in cold-resistant and cold-susceptible cultivars<sup>49</sup>. Taken together, the results of

413 these studies tend to indicate that *NB-ARC* genes might play an important role in endowing  
414 CSS cultivars with cold tolerance. Tea grown along the Yangtze River Basin and in eastern  
415 China is typically subjected to low temperatures in early spring and winter, and most CSA  
416 cultivars, which are characterized by large leaves, cannot survive in these areas. Some CSS  
417 adapted to cold environments survived during the expansion and domestication in eastern  
418 and northern China and after the separation of CSS and CSA, the direction of the  
419 domestication of these two varieties is assumed to have diverged. With the increase in tea  
420 consumption, humans began to select tea plants, and during domestication, selection for  
421 flavor and cold tolerance has been stronger in CSS than that in CSA. This is also reflected  
422 at the genomic level, as illustrated by the KEGG enrichment of expanded gene families, in  
423 which the disease resistance proteins RPS2 and RPS3 were found to be expanded in LJ43.

424 Although in the present study, we found that 214 genes had undergone selection in  
425 both the CSS and CSA populations, we were unable to detect enrichment of any of the  
426 genes associated with flavor and resistance in the CSA population (Supplementary Table  
427 21). It indicates that the selection for INA bacterial resistance and flavor during  
428 domestication has been stronger in CSS than in CSA.

429

## 430 **Methods**

### 431 **Materials and sequencing**

432 We collected samples of 139 tea accessions from around the world (detailed  
433 information is presented in Supplementary Table 16). Among these, 93 samples were  
434 collected from China, with the remaining 46 samples being collected from the other main  
435 tea-producing countries. For the purpose of analyses, we selected *Camellia sasanqua*  
436 Thunb. as an outgroup. DNA was extracted from the leaf tissues of all samples using the

437 CTAB method<sup>50</sup>. Libraries for Illumina truseq, 10x Genomics, and PacBio analyses were  
438 prepared according to the respective manufacturer's instructions. The detailed sequencing  
439 information is presented in Supplementary Material.

#### 440 **Genome assembly and annotation**

441 The detailed information of genome size and genome assembly is presented in  
442 Supplementary Material. Assembly of the LJ43 genome was performed based on the Hi-  
443 C-Pro pipeline and full PacBio reads using WTDBG (version 1.2.8). The final Hi-C  
444 assisted genome assembly was commissioned by Annoroad Gene Technology. Tigmint  
445 (version 1.1.2)<sup>51</sup> was used to find errors using linked reads from 10x Genomics Chromium.  
446 The reads were first aligned to the Hi-C scaffolds, and the extents of the large DNA  
447 molecules were inferred from the alignments of the reads. For larger-scale gaps, we  
448 mapped optical maps from BioNano Genomics to the Hi-C scaffolds using the BioNano  
449 Solve 3.3 analysis pipeline. A high-density genetic linkage map<sup>20</sup> was used to carry the  
450 genomic synteny analysis. The markers were first aligned to the Hi-C scaffolds using “bwa  
451 mem (version 0.7.15).” Properly mapped alignments with mapping quality >1 were  
452 extracted (3,483). Dot plots were plotted and correlations were calculated with the  
453 extracted alignments using R (version 3.4). Repeat sequences were identified using *de novo*  
454 and homology-based methods. Augustus<sup>52</sup> and GlimmHMM<sup>53</sup> were used to analyze *ab*  
455 *initio* gene prediction with parameters trained using unigenes. For homology-based  
456 predictions, we used the homologous proteins proposed for the genomes of *Arabidopsis*  
457 *thaliana*<sup>54</sup>, *Oryza sativa* subsp. *japonica*<sup>55</sup>, *Coffea canephora*<sup>56</sup>, *Theobroma cacao*<sup>57</sup>, and  
458 *Vitis vinifera*<sup>58</sup>. RNA was extracted from five tissue types (bud, leaf, flower, stem, and root)  
459 at four time points (except for flowers during summer). Three biological replicates were

460 set for each sample (Supplementary Table 7), and the transcript reads were assembled using  
461 Cufflinks (version 2.2.1). All of the predicted gene structures were integrated using  
462 EVIDENCEModeler (version 1.1.1)<sup>59</sup>. Protein-coding genes with both of their CDS length  
463 shorter than 300 nt and with stop codons were filtered (except stop codons at the end of a  
464 sequence). Then, we mapped RNA-seq reads against the predicted coding regions by  
465 SOAP2<sup>60</sup>, and selected the predicted gene regions by RNA-seq data (regions with >50%  
466 coverage). The method of gene annotation is described in detail in Supplementary Material.  
467 The method of functional annotation is described in detail in Supplementary Material. The  
468 protein sequences of LJ43 and *Actinidia chinensis*<sup>21</sup> were analyzed by blastp with the  
469 parameters -evalue 1e-5 -num\_alignments 5. Then syntenic blocks were identified by  
470 MCSANX<sup>61</sup> with the parameters -e 1e-20. SCZ and YK10 were analyzed with the same  
471 pipeline and parameters. The genome synteny between *Theobroma cacao*<sup>57</sup> and LJ43, SCZ  
472 and YK10, respectively was also analyzed (Supplementary Material).

#### 473 **Positive Darwinian selection analyses**

474 The species tree was constructed as described in Supplementary Material, without SCZ  
475 and YK10. We identified 1,031 single-copy gene families. The protein sequences of single-  
476 copy genes were aligned by clustalw2<sup>62</sup>, and then the out of clustalw2 was transformed to  
477 nuclear format according to alignment protein sequences using our own Perl script.  
478 Gblocks<sup>63</sup> was used to cut the nuclear alignment sequences by t=c parameter. “Branch-site”  
479 models A and Test2 were chosen to test positive selection by codeml of PAML. The  
480 significant sites were dropped if 5 bp around the site sequences was cut by Gblocks. The  
481 False Discovery Rate (FDR) was used to filter the results (FDR ≤ 0.05).

#### 482 **SNP calling and filtering**

483 Quality controlled reads were mapped to the unmasked tea genome using bwa (version  
484 0.7.15)<sup>64</sup> with the default parameters. SAMtools (version 1.4)<sup>65</sup> was used for sorting and  
485 Picard (v.2.17.0) was used for removing duplicates. The HaplotypeCaller of GATK  
486 (version 3.8.0)<sup>65</sup> was used to construct general variant calling files for the tea group (139  
487 accessions) and outgroup (*C. sanqua*, CM-1) by invoking the options of -ERC:GVCF. The  
488 gVCF files in the tea group were combined using GenotypeGVCFs in GATK to form a  
489 single variant calling file, whereas the gVCF file in the outgroup was called with the option  
490 “-allSites” to include all sites. The final single variant calling file was merged using  
491 bcftools (version 1.6), with only the consistent positions retained in both groups. To obtain  
492 high-quality SNPs, we initially used the GATK Hard-filter to filter the merged VCF with  
493 the options (QD  $\geq$  2.0 && FS  $\leq$  60.0 && MQ  $\geq$  40.0 && MQRankSum  $\geq$  -12.5 &&  
494 ReadPosRankSum  $\geq$  -8.0). Thereafter, we performed strict filtering of the SNP calls based  
495 on the following criteria: (1) sites were located at a distance of least 5 bp from a predicted  
496 insertion/deletion; (2) the consensus quality was  $\geq$ 40; (3) sites did not have triallelic alleles  
497 or InDels; (4) the depth ranged from 2.5% to 97.5% in the depth quartile; and (5) SNPs had  
498 minor allele frequencies (MAF)  $\geq$ 0.01.

#### 499 **Population genetic analyses**

500 We selected high-quality SNPs with a maximum of 20% missing data, and to eliminate  
501 the potential effects of physical linkage among variants, the sites were thinned such that no  
502 two sites were within the same 2,000-bp region of sequence. Phylogenetic analysis was  
503 conducted with the final SNP set using iqtree (version 1.6.9)<sup>66-68</sup>. A maximum likelihood  
504 (ML) phylogenetic tree was calculated using the GTR+F+R5 model, and 1,000 rapid  
505 bootstrap replicates were conducted to determine branch confidence values. The best-

506 fitting model was estimated by ModelFinder implemented in IQTree after testing 286 DNA  
507 models. GTR+F+R5 was chosen according to BIC (Bayesian Information Criterion). The  
508 ML phylogenetic tree was constructed by inter gene region SNP. The ML phylogenetic  
509 trees were also constructed using the final SNP set and 4DTV SNP. Principal component  
510 analysis (PCA) was performed using PLINK (version 1.90) on the final SNP set, with the  
511 principal components being plotted against one another using R 3.4 to visualize patterns of  
512 genetic variation. We also used the final SNP set for population structure analysis using  
513 ADMIXTURE (version 1.3)<sup>69</sup>, which was run with K values (number of assumed ancestral  
514 components) ranging from 1 to 10.

515 Population heterozygosity at a given locus was computed as the fraction of  
516 heterozygous individuals among all individuals in a given population. The average  
517 heterozygosity was then calculated for each 40-kb sliding window, with a step size of 20  
518 kb. Individual heterozygosity was computed as the fraction of loci that are heterozygous in  
519 an individual. Average heterozygosity was also calculated using the same method.  
520 Windows with an average depth <1 were filtered out.

521 In order to eliminate the influence of the difference in sample number, eight samples  
522 of the CSR/CSA/CSS populations were randomly selected to calculate the nucleotide  
523 diversity. We repeated 20 times for each population to reduce the sampling error.  
524 Vcftools (version 0.1.16) with the window size 50kb and the stepping size 10kb was used  
525 to calculate the nucleotide diversity of the sample population. For each population, all the  
526 20 results were collected, and the boxplot was plotted with R.

527 **Selective sweep analysis**

528 Treetime 0.5.3<sup>70</sup> was used to infer the ancestral state based on ML using the generated  
529 evolutionary tree. Sites lacking a reconstructed ancestral state in a population were folded  
530 in the SweepFinder2 analysis. We excluded sites that were neither polymorphic nor  
531 substitutions, as recommended by the SweepFinder2 manual<sup>71</sup>. To reduce false positives,  
532 the chromosome-wide frequency spectrum was calculated as the background for each  
533 chromosome and for each population. SweepFinder2 was run with a grid size of 100. The  
534 CLR scores from the SweepFinder2 results were extracted, and scores were merged into  
535 sweep regions when the neighboring score(s) exceeded a certain threshold, which was set  
536 as the top 1% of CLR scores. To obtain regions with greater continuity, we merged regions  
537 into a single region with a certain size threshold between regions; the threshold was set to  
538 50% of the size in adjacent sweep regions. The final score for each sweep region was the  
539 sum of the CLR scores of the sites in the sweep region. The final sweep regions were  
540 filtered based on a minimum size of 300 bp. Gene overlap within the sweep regions was  
541 extracted as the candidate selective sweep genes. The GO-enriched (P-value < 0.05, FDR  
542 < 0.05) candidate selective sweep genes were selected, and the *Fst*,  $\theta_\pi$  and Tajima's D  
543 values were calculated using vcfTools, with a window size of 50,000 bp and a step size of  
544 10,000 bp..

#### 545 **Gene expression**

546 Transcript-level expression was calculated using HISAT2, StringTie, and Ballgown  
547 with the default parameters<sup>72</sup>. The genes identified in the selection results were selected for  
548 expression analysis, and an expression heat map was plotted using the Heatmap package  
549 in R 3.4. The average expression of selection genes in Fig. 3d was calculated by seasons,



550 while the average expression of selection genes in Fig. 3c was calculated by tissues.

551 Student's T-test was used to identify the significantly different genes (P-value < 0.05).

## 552 **Data availability**

553 The raw sequence data, genome sequence data, and genes sequence data reported in  
554 this paper have been deposited in the Genome Sequence Archive<sup>73</sup> in BIG Data Center<sup>74</sup>  
555 (Nucleic Acids Res 2019), Beijing Institute of Genomics (BIG), Chinese Academy of  
556 Sciences, under accession numbers PRJCA001158, PRJCA001158 that are publicly  
557 accessible at <https://bigd.big.ac.cn/gsa>.

## 558 **References**

- 559 1. Xia, E.H. *et al.* The tea tree genome provides insights into tea flavor and  
560 independent evolution of caffeine biosynthesis. *Mol. Plant* **10**, 866-877 (2017).
- 561 2. Wei, K. *et al.* A coupled role for CsMYB75 and CsGSTF1 in anthocyanin  
562 hyperaccumulation in purple tea. *Plant J.* **97**, 825-840 (2019).
- 563 3. Lu, H. *et al.* Earliest tea as evidence for one branch of the Silk Road across the  
564 Tibetan Plateau. *Sci. Rep.-UK* **6**, 18955 (2016).
- 565 4. Wu, J. Review on 'Cha Ching'. (Beijing: Agriculture Press, 1987).
- 566 5. Harbowy, M.E. & Balentine, D.A. Tea chemistry. *Crit. Rev. Plant Sci.* **16**, 415-  
567 480 (1997).
- 568 6. Hara, Y., Luo, S.J., Wickremasinghe, R.L. & Yamanishi, T. Special issue on tea.  
569 *Food Rev. Int.* **11**, 371-546 (1997).
- 570 7. Liang, Y. & Shi, M. Advances in tea plant genetics and breeding. *J. Tea Sci.* **35**,  
571 103-109 (2015).
- 572 8. Chen, L., Yu, F. & Tong, Q. Discussions on Phylogenetic Classification and  
573 Evolution of Sect. Thea. *J. Tea Sci.* **20**, 89-94 (2000).
- 574 9. Yang, J.-B., Yang, J., Li, H.-T., Zhao, Y. & Yang, S.-X. Isolation and  
575 characterization of 15 microsatellite markers from wild tea plant (*Camellia*  
576 *taliensis*) using FIASCO method. *Conserv. Genet.* **10**, 1621-1623 (2009).
- 577 10. Raina, S.N. *et al.* Genetic structure and diversity of India hybrid tea. *Genet.*  
578 *Resour. Crop Ev.* **59**, 1527-1541 (2012).
- 579 11. Zhang, W., Rong, J., Wei, C., Gao, L. & Chen, J. Domestication origin and spread  
580 of cultivated tea plants. *Biodivers. Sci.* **26**, 357-372 (2018).
- 581 12. Huang, H., Shi, C., Liu, Y., Mao, S.Y. & Gao, L.Z. Thirteen *Camellia* chloroplast  
582 genome sequences determined by high-throughput sequencing: genome structure  
583 and phylogenetic relationships. *BMC Evol. Biol.* **14**, 151 (2014).
- 584 13. Miao-Miao, L.I., Kasun, M.M., Yan, L.J., Liu, J. & Gao, L.M. Genetic  
585 Involvement of *Camellia taliensis* in the domestication of *C.sinensis* var.

- 586 *assamica* (Assamica Tea) revealed by nuclear microsatellite markers. *Plant*  
587 *Divers. Resour.* **37**, 29 -37 (2015)
- 588 14. Yao, M.Z., Ma, C.L., Qiao, T.T., Jin, J.Q. & Chen, L. Diversity distribution and  
589 population structure of tea germplasms in China revealed by EST-SSR markers.  
590 *Tree Geneti. Genome.* **8**, 205-220 (2012).
- 591 15. Chen *et al.* Discrimination of *Wild Tea Germplasm Resources (Camellia sp.)*  
592 using RAPD markers. *Agr. Sci. China* **1**, 1105-1110 (2002).
- 593 16. Wei, C.L. *et al.* Draft genome sequence of *Camellia sinensis* var. *sinensis*  
594 provides insights into the evolution of the tea genome and tea quality. *Proc. Natl*  
595 *Acad. Sci. USA* **115**, E4151-E4158 (2018).
- 596 17. Simao, F.A., Waterhouse, R.M., Ioannidis, P., Kriventseva, E.V. & Zdobnov,  
597 E.M. BUSCO: assessing genome assembly and annotation completeness with  
598 single-copy orthologs. *Bioinformatics* **31**, 3210-2 (2015).
- 599 18. Yang, Y. & Liang, Y. *Clonal Tea Plant Cultivar Records of China*, (2014).
- 600 19. Ruan, J. & Li, H. Fast and accurate long-read assembly with wtdbg2. *Nat.*  
601 *Methods* **17**, 155-158 (2020).
- 602 20. Ma, J.Q. *et al.* Construction of a ssr-based genetic map and identification of qtls  
603 for catechins content in tea plant (*Camellia sinensis*). *PLoS ONE* **9**, e93131  
604 (2014).
- 605 21. Huang, S. *et al.* Draft genome of the kiwifruit *Actinidia chinensis*. *Nat. Commun.*  
606 **4**, 2640 (2013).
- 607 22. Salojärvi, J. *et al.* Genome sequencing and population genomic analyses provide  
608 insights into the adaptive landscape of silver birch. *Nat. Genet.* **49**, 904-912  
609 (2017).
- 610 23. Teh, B.T. *et al.* The draft genome of tropical fruit durian (*Durio zibethinus*). *Nat.*  
611 *Genet.* **49**, 1633-1641 (2017).
- 612 24. Sun, S.L. *et al.* Extensive intraspecific gene order and gene structural variations  
613 between Mo17 and other maize genomes. *Nat. Genet.* **50**, 1289-1295 (2018).
- 614 25. Ou, S.J., Chen, J.F. & Jiang, N. Assessing genome assembly quality using the  
615 LTR Assembly Index (LAI). *Nucleic Acids Res.* **46**, e126 (2018).
- 616 26. Gaut, B.S., Morton, B.R., McCaig, B.C. & Clegg, M.T. Substitution rate  
617 comparisons between grasses and palms: Synonymous rate differences at the  
618 nuclear gene *Adh* parallel rate differences at the plastid gene *rbcL*. *Proc. Natl*  
619 *Acad. Sci. USA* **93**, 10274-10279 (1996).
- 620 27. Garcia-Andrade, J., Ramirez, V., Flors, V. & Vera, P. *Arabidopsis ocp3* mutant  
621 reveals a mechanism linking ABA and JA to pathogen-induced callose deposition.  
622 *Plant J.* **67**, 783-94 (2011).
- 623 28. Koh, E., Carmieli, R., Mor, A. & Fluhr, R. Singlet oxygen-induced membrane  
624 disruption and serpin-protease balance in vacuolar-driven cell death. *Plant*  
625 *Physiol.* **171**, 1616-25 (2016).
- 626 29. Fourier, N. *et al.* A role for SENSITIVE TO FREEZING2 in protecting  
627 chloroplasts against freeze-induced damage in *Arabidopsis*. *Plant J.* **55**, 734-45  
628 (2008).
- 629 30. Liu, J. & Last, R.L. MPH1 is a thylakoid membrane protein involved in protecting  
630 photosystem II from photodamage in land plants. *Plant Signal. Behav.* **10**:  
631 **e1076602** (2015).

- 632 31. Lynch, M. & Conery, J.S. The evolutionary fate and consequences of duplicate  
633 genes. *Science* **290**, 1151-1155 (2000).
- 634 32. Pateraki, I., Heskes, A.M. & Hamberger, B. Cytochromes P450 for terpene  
635 functionalisation and metabolic engineering. *Adv. Biochem. Eng. Biotechnol.* **148**,  
636 107-39 (2015).
- 637 33. Mackey, D., Holt, B.F., Wiig, A. & Dangl, J.L. RIN4 interacts with *Pseudomonas*  
638 *syringae* type III effector molecules and is required for RPM1-mediated resistance  
639 in *Arabidopsis*. *Cell* **108**, 743-754 (2002).
- 640 34. Warren, R.F., Henk, A., Mowery, P., Holub, E. & Innes, R.W. A mutation within  
641 the leucine-rich repeat domain of the *Arabidopsis* disease resistance gene RPS5  
642 partially suppresses multiple bacterial and downy mildew resistance genes. *Plant*  
643 *Cell* **10**, 1439-1452 (1998).
- 644 35. Zhang, Z.B. *et al.* Disruption of PAMP-Induced MAP Kinase Cascade by a  
645 *Pseudomonas syringae* Effector Activates Plant Immunity Mediated by the NB-  
646 LRR Protein SUMM2. *Cell Host Microbe* **11**, 253-263 (2012).
- 647 36. Wang, X., Yao, M., Ma, C. & Liang, C. Analysis and evaluation of biochemical  
648 components in bitter tea plant germplasms. *Chinese Agr. Sci. Bull.* **24(6)**, 65-69  
649 (2008).
- 650 37. Zhao, D.W., Yang, J.B., Yang, S.X., Kato, K. & Luo, J.P. Genetic diversity and  
651 domestication origin of tea plant *Camellia taliensis* (Theaceae) as revealed by  
652 microsatellite markers. *BMC Plant Biol.* **14**, 14 (2014).
- 653 38. Chen, C. *The General History of Tea Industry*, (Chinese Agricultural Press,  
654 Beijing, 2008).
- 655 39. Li, W. The Evolution of bashu tea culture and the development of Chinese tea  
656 culture. *Chongqing Social Sci.* **10**, 100-104 (2009).
- 657 40. Meegahakumbura, M.K. *et al.* Indications for three independent domestication  
658 events for the tea plant (*Camellia sinensis* (L.) O. Kuntze) and new insights into  
659 the origin of tea germplasm in China and India revealed by nuclear  
660 microsatellites. *PLoS ONE* **11**, e0155369 (2016).
- 661 41. Meegahakumbura, M.K. *et al.* Domestication origin and breeding history of the  
662 tea plant (*Camellia sinensis*) in China and India based on nuclear microsatellites  
663 and cpDNA sequence data. *Front. Plant Sci.* **8**, 2270 (2017).
- 664 42. Yang, Z., Baldermann, S. & Watanabe, N. Recent studies of the volatile  
665 compounds in tea. *Food Res. Int.* **53**, 585-599 (2013).
- 666 43. Owuor, P.O., Takeo, T., Horita, H., Tsushida, T. & Murai, T. Differentiation of  
667 clonal teas by terpene index. *J. Sci. Food Agr.* **40**, 341-345 (2010).
- 668 44. Takeo, T. *et al.* One speculation the origin and dispersion of tea plant in China--  
669 One speculation based on the chemotaxonomy by using the content-ratio of  
670 terpene-alcohols found in tea aroma composition. *J. Tea Sci.* **12**, 81-86 (1992).
- 671 45. Takeo, T. Variation in amounts of linalol and geraniol produced in tea shoots by  
672 mechanical injury. *Phytochemistry* **20**, 2149-2151 (1981).
- 673 46. Wan, X. & Xia, T. *Secondary Metabolism of Tea Plant*, (China Science  
674 Publishing, Beijing, 2015).
- 675 47. Xin, X.F., Kvitko, B. & He, S.Y. *Pseudomonas syringae*: what it takes to be a  
676 pathogen. *Nat. Rev. Microbiol.* **16**, 316-328 (2018).

- 677 48. Song, J.Q. *et al.* Gene RB cloned from *Solanum bulbocastanum* confers broad  
678 spectrum resistance to potato late blight. *Proc. Natl Acad. Sci. USA* **100**, 9128-  
679 9133 (2003).
- 680 49. Wang, L. *et al.* Transcriptional and physiological analyses reveal the association  
681 of ROS metabolism with cold tolerance in tea plant. *Environ.Exp. Bot.* **160**, 45-58  
682 (2019).
- 683 50. Healey, A., Furtado, A., Cooper, T. & Henry, R.J. Protocol: a simple method for  
684 extracting next-generation sequencing quality genomic DNA from recalcitrant  
685 plant species. *Plant Methods* **10**(2014).
- 686 51. Jackman, S.D. *et al.* Tigmint: correcting assembly errors using linked reads from  
687 large molecules. *Bmc Bioinformatics* **19**(2018).
- 688 52. Stanke, M., Tzvetkova, A. & Morgenstern, B. AUGUSTUS at EGASP: using  
689 EST, protein and genomic alignments for improved gene prediction in the human  
690 genome. *Genome Biol.* **7 Suppl 1**, S11 1-8 (2006).
- 691 53. Majoros, W.H., Pertea, M. & Salzberg, S.L. TigrScan and GlimmerHMM: two  
692 open source ab initio eukaryotic gene-finders. *Bioinformatics* **20**, 2878-2879  
693 (2004).
- 694 54. Kaul, S. *et al.* Analysis of the genome sequence of the flowering plant  
695 *Arabidopsis thaliana*. *Nature* **408**, 796-815 (2000).
- 696 55. Goff, S.A. *et al.* A draft sequence of the rice genome (*Oryza sativa* L. ssp.  
697 *japonica*). *Science* **296**, 92-100 (2002).
- 698 56. Denoeud, F. *et al.* The coffee genome provides insight into the convergent  
699 evolution of caffeine biosynthesis. *Science* **345**, 1181-1184 (2014).
- 700 57. Argout, X. *et al.* The genome of *Theobroma cacao*. *Nat. Genet.* **43**, 101-108  
701 (2011).
- 702 58. Jaillon, O. *et al.* The grapevine genome sequence suggests ancestral  
703 hexaploidization in major angiosperm phyla. *Nature* **449**, 463-467 (2007).
- 704 59. Haas, B.J. *et al.* Automated eukaryotic gene structure annotation using  
705 EVIDENCEModeler and the Program to Assemble Spliced Alignments. *Genome*  
706 *Biol.* **9**, R7 (2008).
- 707 60. Li, R.Q. *et al.* SOAP2: an improved ultrafast tool for short read alignment.  
708 *Bioinformatics* **25**, 1966-1967 (2009).
- 709 61. Wang, Y.P. *et al.* MCScanX: a toolkit for detection and evolutionary analysis of  
710 gene synteny and collinearity. *Nucleic Acid. Res.* **40**, e49 (2012).
- 711 62. Larkin, M.A. *et al.* Clustal W and clustal X version 2.0. *Bioinformatics* **23**, 2947-  
712 2948 (2007).
- 713 63. Castresana, J. Selection of conserved blocks from multiple alignments for their  
714 use in phylogenetic analysis. *Mol. Biol. Evol.* **17**, 540-552 (2000).
- 715 64. Li, H. & Durbin, R. Fast and accurate short read alignment with Burrows-Wheeler  
716 transform. *Bioinformatics* **25**, 1754-1760 (2009).
- 717 65. Li, H. *et al.* The sequence alignment/map format and SAMtools. *Bioinformatics*  
718 **25**, 2078-2079 (2009).
- 719 66. Nguyen, L.T., Schmidt, H.A., von Haeseler, A. & Minh, B.Q. IQ-TREE: a fast  
720 and effective stochastic algorithm for estimating maximum-likelihood  
721 phylogenies. *Mol. Biol. Evol.* **32**, 268-274 (2015).

- 722 67. Hoang, D.T., Chernomor, O., von Haeseler, A., Minh, B.Q. & Vinh, L.S.  
723 UFBoot2: improving the ultrafast bootstrap approximation. *Mol. Biol. Evol.* **35**,  
724 518-522 (2018).
- 725 68. Kalyaanamoorthy, S., Minh, B.Q., Wong, T.K.F., von Haeseler, A. & Jermin,  
726 L.S. ModelFinder: fast model selection for accurate phylogenetic estimates. *Nat.*  
727 *Methods* **14**, 587-589 (2017).
- 728 69. Alexander, D.H., Novembre, J. & Lange, K. Fast model-based estimation of  
729 ancestry in unrelated individuals. *Genome Res.* **19**, 1655-1664 (2009).
- 730 70. Sagulenko, P., Puller, V. & Neher, R.A. TreeTime: Maximum-likelihood  
731 phylodynamic analysis. *Virus Evol.* **4**, vex042 (2018).
- 732 71. DeGiorgio, M., Huber, C.D., Hubisz, M.J., Hellmann, I. & Nielsen, R.  
733 SweepFinder2: increased sensitivity, robustness and flexibility. *Bioinformatics* **32**,  
734 1895-1897 (2016).
- 735 72. Pertea, M., Kim, D., Pertea, G.M., Leek, J.T. & Salzberg, S.L. Transcript-level  
736 expression analysis of RNA-seq experiments with HISAT, StringTie and  
737 Ballgown. *Nat. Protoc.* **11**, 1650-1667 (2016).
- 738 73. Wang, Y.Q. *et al.* GSA: Genome Sequence Archive. *Genom. Proteom. Bioinf.* **15**,  
739 14-18 (2017).
- 740 74. Zhang, Z. *et al.* Database resources of the BIG data center in 2019. *Nucleic Acid.*  
741 *Res.* **47**, D8-D14 (2019).
- 742

743

#### 744 **Acknowledgements**

745 This work was funded by Agricultural Science and Technology Innovation Program  
746 of the Chinese Academy of Agricultural Sciences (CAAS-ASTIP-2017-TRICAAS and  
747 CAAS-ASTIP-2017-AGISCAAS), the Agricultural Science and Technology Innovation  
748 Program Cooperation and Innovation Mission (CAAS-XTCX2016), the Major Science  
749 and Technology Special Project of Variety Breeding of Zhejiang Province  
750 (2016C02053), the Shenzhen Science and Technology Research Funding  
751 (JSGG20160429104101251), and the National Youth Talent Support Program and the  
752 Program for the Innovative Research Team of Yunnan Province. We thank Hualing  
753 Huang (Tea Research Institute of Guangdong Agricultural Academy of Sciences), Haitao  
754 Zheng (Rizhao Tea Research Institute), and Lizhe Lv (Xinyang Tea Research Institute)

755 for supplying tea plant samples. We thank Xiujuan Shao for analyzing the gene  
756 annotation of LJ43.

757 **Author contributions**

758 X.W., Y.C., G.W., L.C., J.R., and Y.Y. designed the experiments and managed the  
759 project. X.W., F.H., Y.C., C.M., L.Y.W., X.H., and A.L., wrote the manuscript with input  
760 from all authors. X.W., F.H., Y.C., C.M., X.H., A.L., H.C., J.J., L.W., K.W., X.B.W.,  
761 C.A., Z.W., S.Z., P.C., Y.L., B.L., G.W., L.C., J.R., and Y.Y. collected the samples,  
762 extracted genetic material, analyzed the data, and performed the experiments. X.W.,  
763 Y.C., C.M., X.H., and S.Z. performed experiments and the genomic and RNA-  
764 sequencing. J.R. performed the genome assembly analyses. H.F. and X.B.W. performed  
765 the gene annotation analyses. H.F., X.H., A.L., and C.A. performed transcriptomic  
766 analyses. X.W., H.F., A.L., and G.W. performed population analyses. X.W., Y.C., P.C.,  
767 L.C., G.W., J.R., and Y.Y. revised the manuscript.

768 **Competing interests**

769 The authors declare no competing interests.

770

771



772 **Figures**

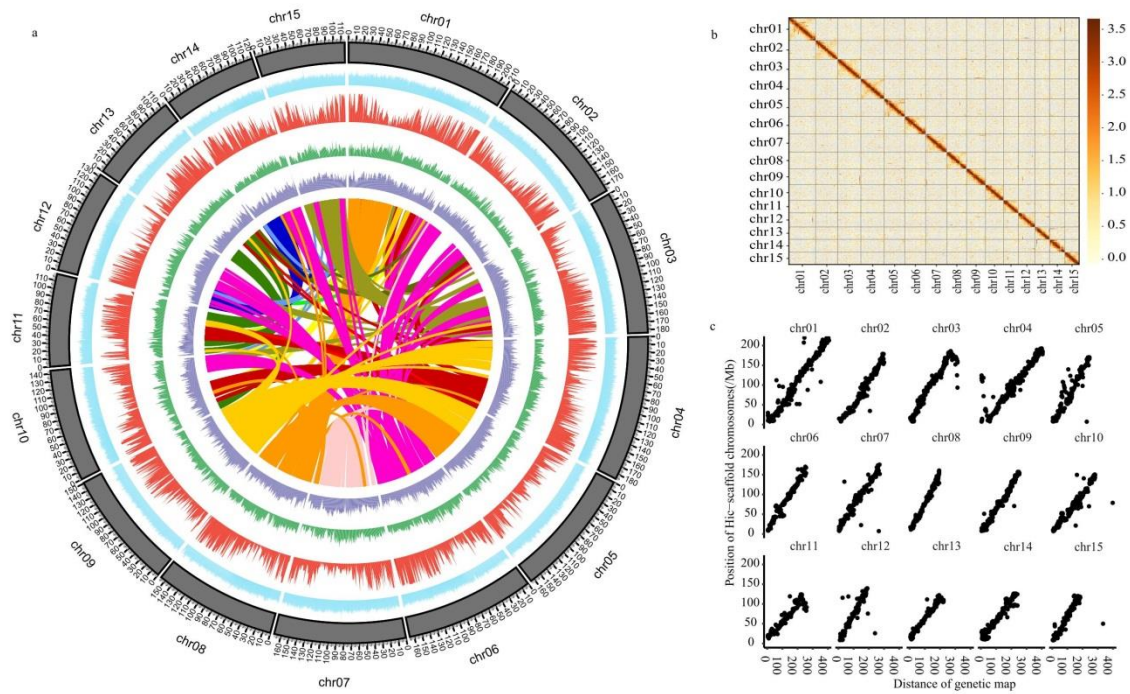

773

774

775 Fig. 1. Characterization and quality of the LJ43 genome.

776 a, The landscape of the LJ43 genome. From inside to outside: LJ43 gene collinearity; long

777 terminal repeat density (purple); single-nucleotide polymorphism density (green); gene

778 density (red); GC content (blue). The chromosome units of all the above-mentioned

779 features are 1 Mbp. b, Genome-wide all-by-all Hi-C interaction. The resolution is 0.5 Mbp.

780 c, The collinearity of the genetic map and assembled genome.

781

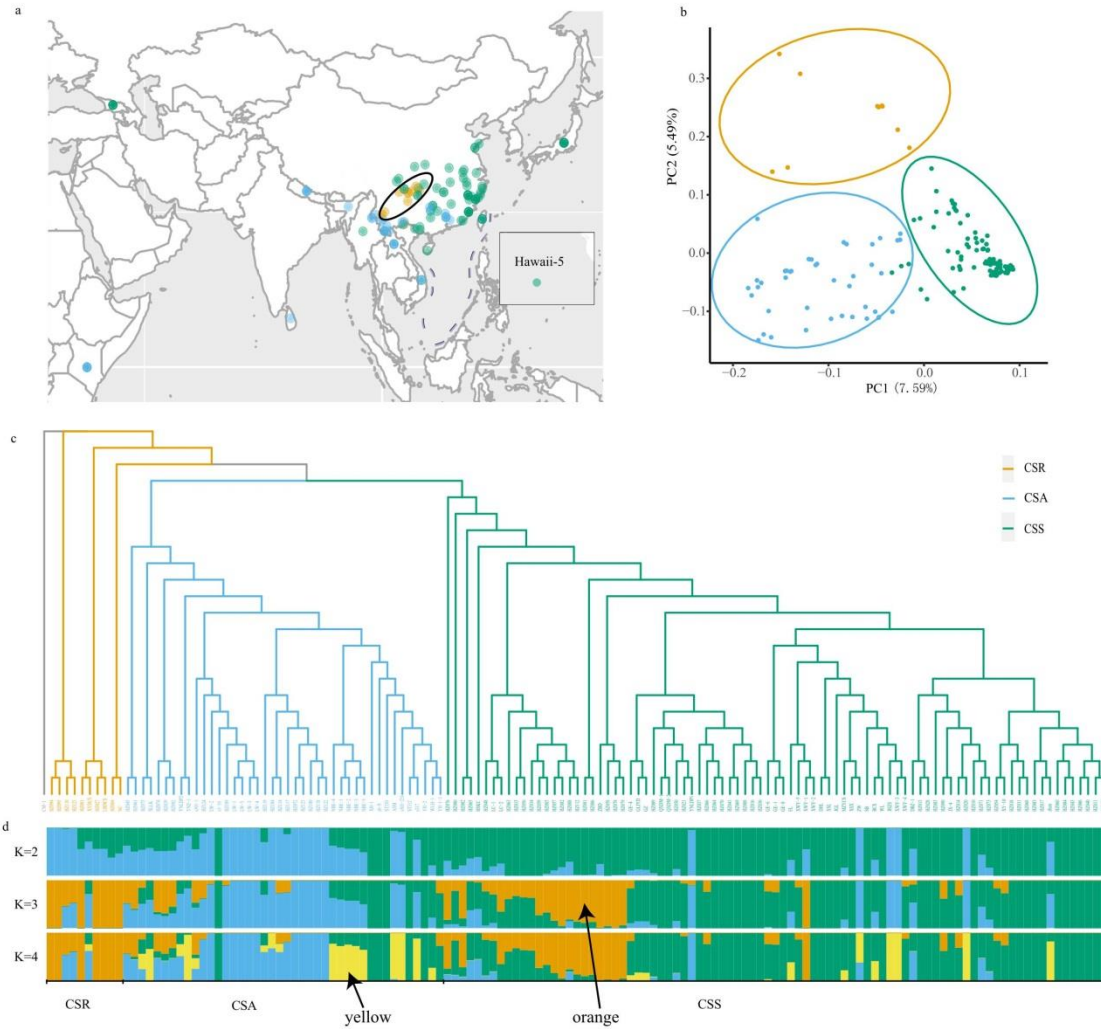

782

783 Fig. 2. Distribution and evolution of tea.

784 a, The distribution of tea accessions assessed in the present study. The teas within the black

785 oval, had the highest nucleotide polymorphisms. b, Principal component analysis of the tea

786 populations. PC1 and PC2 split the tea populations into three clusters. The *Camellia*

787 *sinensis* var. *sinensis* (CSS) samples were found to cluster more tightly than the *C. sinensis*

788 var. *assamica* (CSA) samples. c, A phylogenetic tree of tea. *Camellia sasanqua* Thunb.

789 was used as the outgroup, and the tea samples closest to the outgroup were *C. sinensis*-

790 related species (CSR). d, The structure of the tea populations. The green, blue, and yellow



791 represent CSS, CSA, and CSR populations, respectively. The yellow and orange are  
 792 marked with arrows.

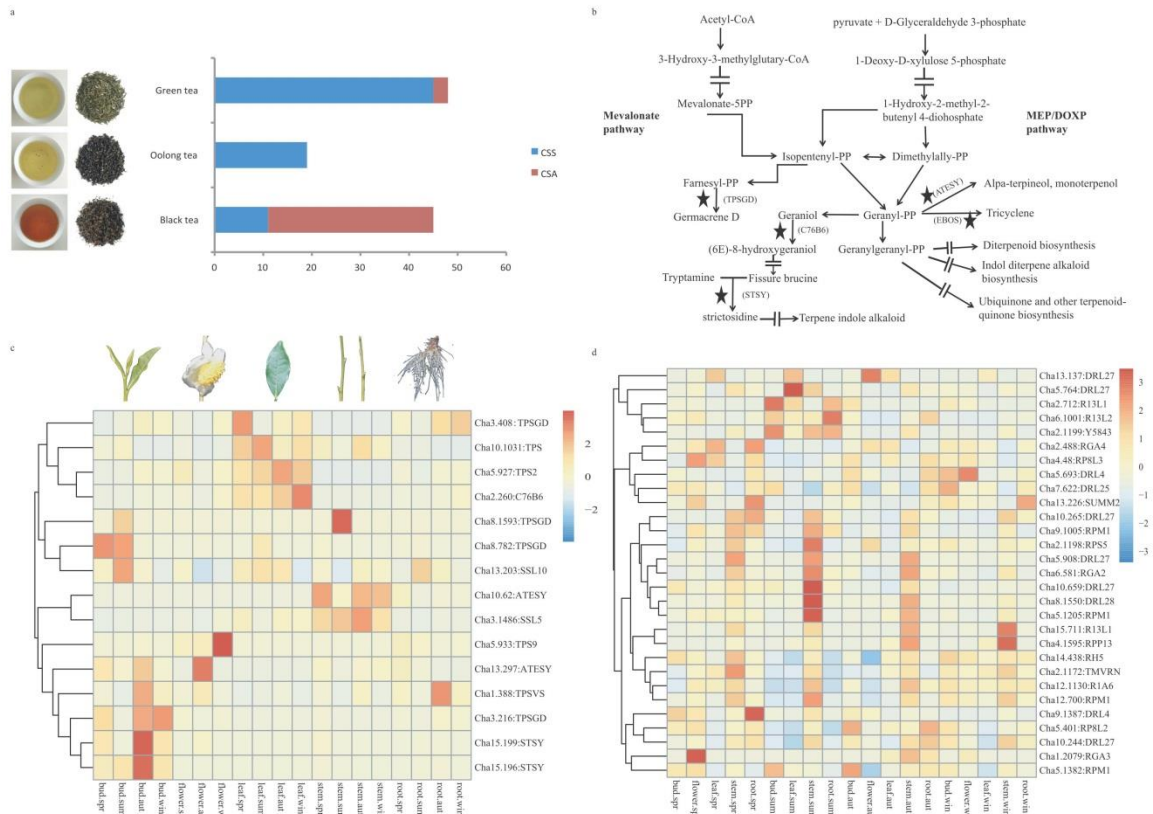

793

794 Fig. 3. Sweep gene sets in *Camellia sinensis* var. *assamica* (CSA) and *C. sinensis* var.  
 795 *sinensis* (CSS) show the different directions of domestication.

796 a, The tea types were used to analyze the SweepFinder results of CSS and CSA. b, The  
 797 pathway of terpene metabolism. The selective sweep genes are indicated by stars. The  
 798 arrows bisected by equals symbols indicate hidden processes. c, The expression of terpene-  
 799 related genes in different tea tissues. d, The expression of *NBS-ARC* genes in different tea  
 800 tissues.

## 801 Tables

802 Table 1. Genome assembly and annotated genes of the tea cultivars LJ43, SCZ, and YK10

---

|                                          | LJ43        | SCZ      | YK10     |
|------------------------------------------|-------------|----------|----------|
| Genome size                              | 3.26 G      | 3.14 G   | 3.02 G   |
| Contigs N50                              | 271.33 kb   | 67.01 kb | 19.96 kb |
| Scaffold N50                             | 143.85 Mb   | 1.39 Mb  | 0.45 Mb  |
| GC percentage                            | 38.67%      | 37.84%   | 39.62%   |
| Number of genes                          | 33,556      | 33,932   | 36,951   |
| Number of exons                          | 188,681     | 191,870  | 176,616  |
| Length of exons                          | 40.4 Mb     | 45.6 Mb  | 41.6 Mb  |
| Average length of exons                  | 226.1 bp    | 237.8 bp | 235.6 bp |
| Average length of genes<br>(intron+exon) | 10,815.5 bp | 7,385 bp | 3,548 bp |
| Average number of exons per<br>gene      | 5.3         | 5.7      | 4.8      |
| Average length of coding<br>sequence     | 1,205 bp    | 1,345 bp | 1,131 bp |
| BUSCO                                    | 88.36%      | 80.58%   | 68.58%   |

---
